# Supplementary material for: The Use of Iron-Doped Anatase TiO2 Nanofibers for Enhanced Photocatalytic Fenton-like Reaction to Degrade Tylosin
Source: MDPI journal article supplement (doi:10.3390/molecules28196977), 2023-10-08
Supplement: s1 [file s1]

# The Use of Iron-Doped Anatase TiO<sub>2</sub> Nanofibers for Enhanced Photocatalytic Fenton-like Reaction to Degrade Tylosin

Xiao Wang <sup>1,2,3,\*</sup>, Wei Lu <sup>1,2,\*</sup>, Shangui Zhang <sup>1,2</sup>, Changqing Guo <sup>1,2</sup>, Kai Yang <sup>1,2</sup>, Yan Sun <sup>1,2</sup>, Yashi Shao <sup>1,2</sup>, Qiyuan Li <sup>1,2</sup>, Mingsheng Bu <sup>1,2</sup>, Lianfeng Wu <sup>1,2</sup>, Bo Wang <sup>1,2</sup> and Dongjiang Yang <sup>3</sup>

<sup>1</sup> State Key Laboratory of Marine Coatings, Qingdao 266071, China; zhangshangui@sinochem.com (S.Z.); wulianfeng@sinochem.com (L.W.)

<sup>2</sup> Marine Chemical Research Institute Co., Ltd., Qingdao 266071, China

<sup>3</sup> School of Environmental Science and Engineering, Qingdao University, Qingdao 266071, China; d.yang@qdu.edu.cn

\* Correspondence: wangxiao\_qingdao@126.com (X.W.); luwei16@sinochem.com (W.L.)

## S1. Experimental section

### S1.1 Synthesis and characterization of titanium dioxide nanofibers

In the hydrothermal process, 1 g of anatase  $\text{TiO}_2$  powder and 60 mL of 10 M NaOH solution was mixed together. The above mixture was agitated for 12 h and then transferred into a Teflon-lined stainless-steel autoclave. The autoclave was maintained at 180 °C for 48 h. The precipitate (sodium titanate nanofibers, NFs) was recovered, washed with distilled water, exchanged with  $\text{H}^+$  (using a 0.1 M HCl solution) to produce  $\text{H}_2\text{Ti}_3\text{O}_7$  NFs, and washed again with distilled water. The  $\text{H}_2\text{Ti}_3\text{O}_7$  NF product was dried and then calcined in a muffle furnace at 700 °C for 4 h to produce anatase  $\text{TiO}_2$  NFs.

### S1.2 Measurements

Electron paramagnetic resonance (EPR) tests were performed on a Bruker ELEXSYS E500 X-band spectrometer. Specifically, 10 mg of catalyst was added into 10 mL of water (for  $\cdot\text{OH}$  and  $\text{SO}_4\cdot^-$  capture), and ultrasonically treated for 5 min. Then, 200  $\mu\text{L}$  of 5,5-dimethyl-1-pyrroline N-oxide (DMPO, 100 mM) was added to the above dispersions (200  $\mu\text{L}$ ). Then, the mixture was put into the capillary tube for testing at room temperature. A 300 W Xe lamp with a 420 nm cutoff filter was used as light source. The experiments under dark condition and with light after visible light irradiation for 10 min and 20 min were recorded.

## S2. Supplementary figures

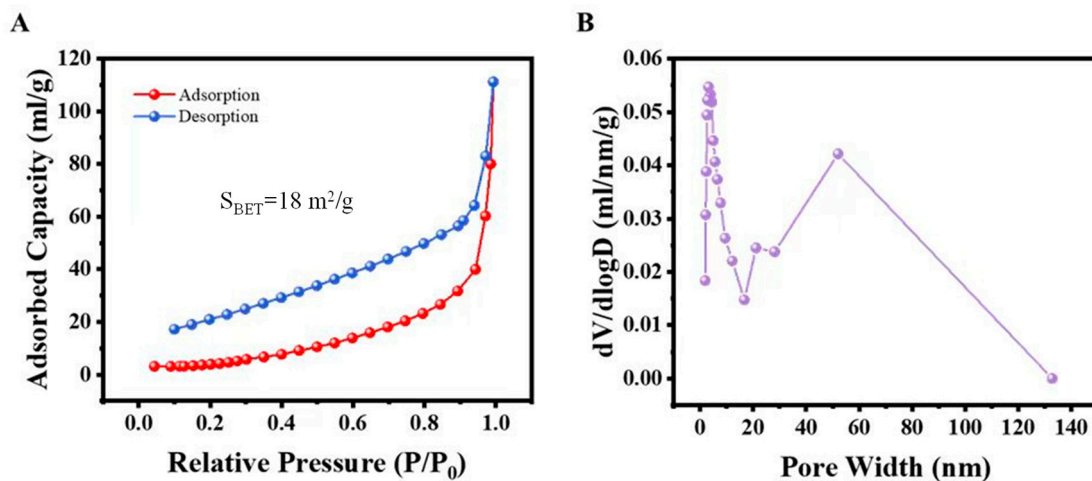

Figure S1. (A)  $N_2$  adsorption and desorption of Fe-TNs; (B) Pore size distribution of Fe-TNs.

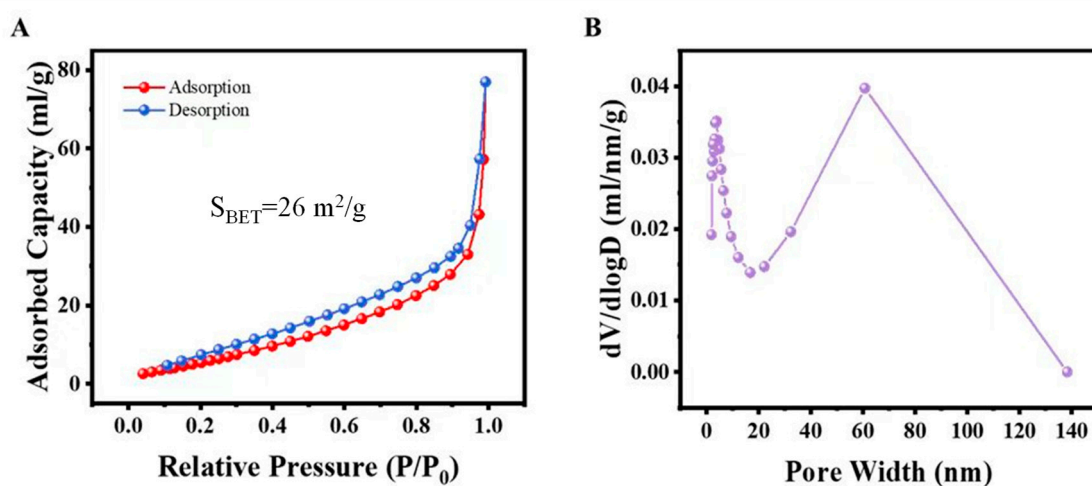

Figure S2. (A)  $N_2$  adsorption and desorption of TNs; (B) Pore size distribution of TNs.

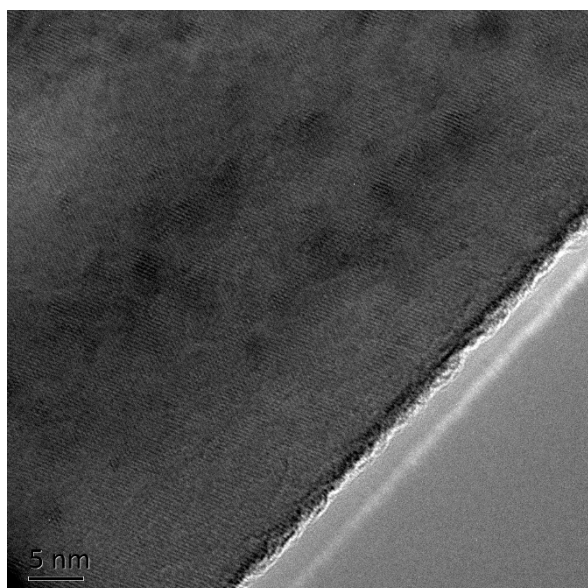

Figure S3. TEM images of Fe-TNs.

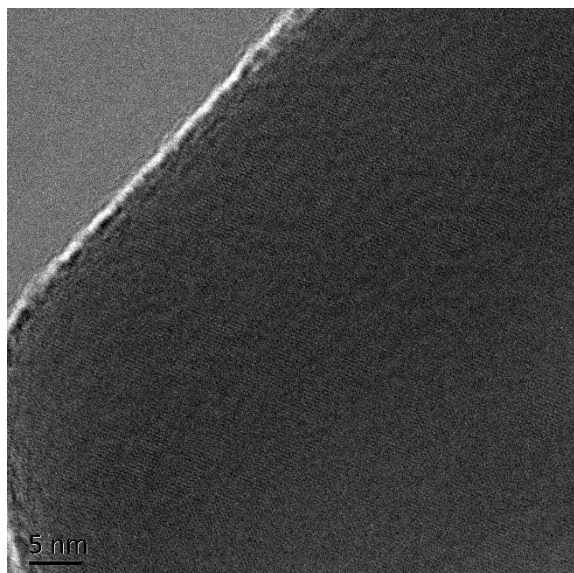

Figure S4. TEM images of Fe-TNs 5% after reactions.

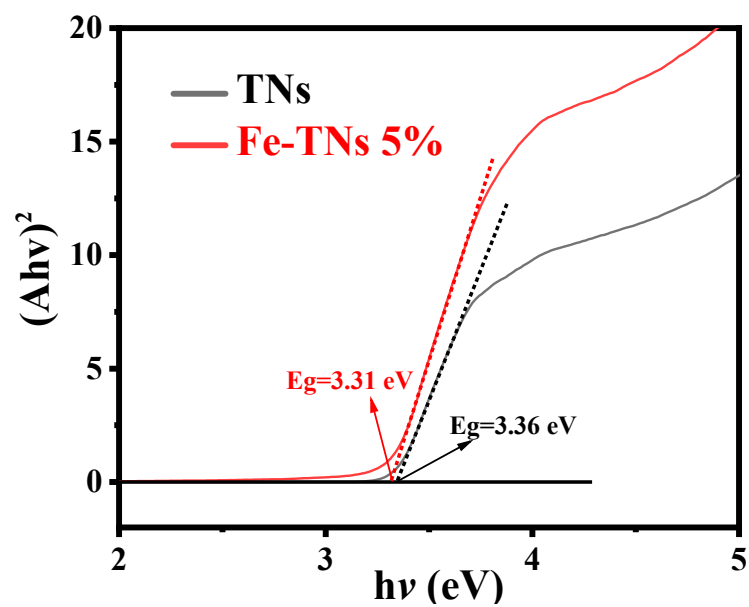

Figure S5. Tauc plots for TNs and Fe-TNs 5%.

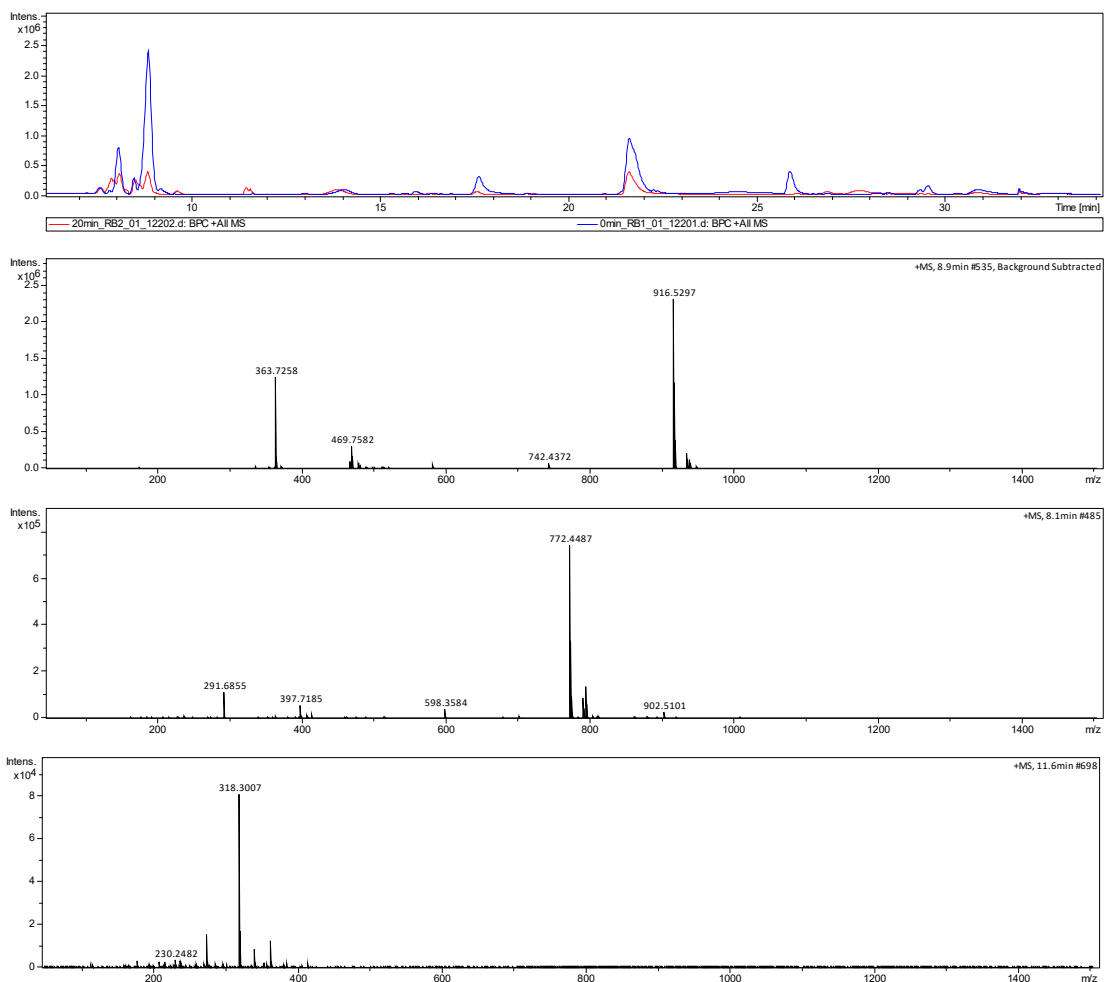

Figure S6. LCMS results of TYL in the reactions (0 and 20 min).

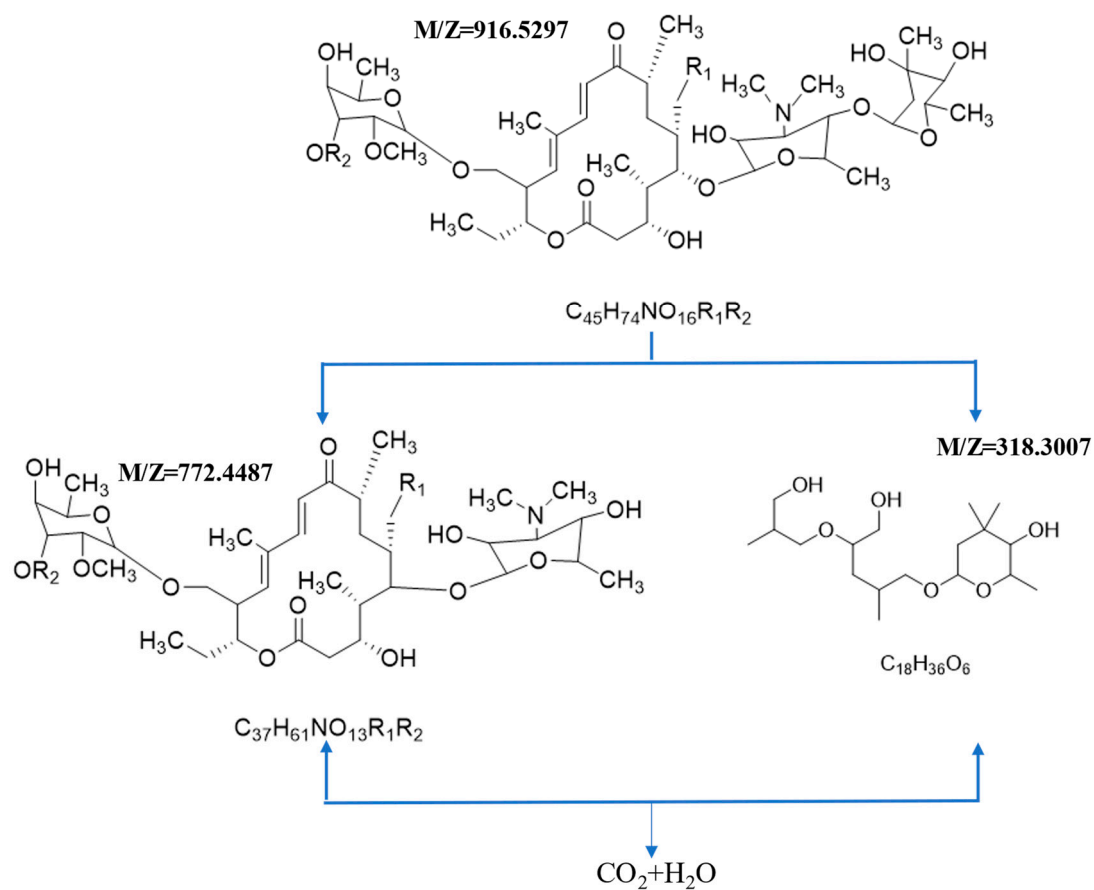

Figure S7. Degradation pathway of TYL.

Table S1. Comparison of several catalysts for degradation of TYL.

| Catalysis                                        | Methods               | Dosage (g/L)      | TYL<br>(mg/L) | Performance<br>(min)) | (%) |
|--------------------------------------------------|-----------------------|-------------------|---------------|-----------------------|-----|
| ZIF-11(Zn/Co) <sup>[1]</sup>                     | Persulfate-activation | 0.2               | 60            | 80 (30)               |     |
| Montmorillonite <sup>[2]</sup>                   | Photocatalysis        | 1                 | 30            | 80.8 (480)            |     |
| Au/TiO <sub>2</sub> -CCBs <sup>[3]</sup>         | Photocatalysis        | 50                | 20            | 92 (180)              |     |
| TNTAs/P <sup>[4]</sup>                           | Photoelectrocatalysis | 15*15 mm/(200 mL) | 10            | 79 (250 min)          |     |
| WS <sub>2</sub> @CeO <sub>2</sub> <sup>[5]</sup> | Sonolysis             | 1.0               | 10            | 75.6 (120 min)        |     |
| FeS <sub>2</sub> /RGO <sup>[6]</sup>             | photocatalysis        | 1.2               | 10            | 90 (120 min)          |     |
| (This work)                                      | Photocatalysis        | 0.5               | 20            | 98.5 (240 min)        |     |

## References

- [1] Ling, F.; Xiao, X.; Li, Y.; Li, W. A Zn/Co bimetal zeolitic imidazolate framework material as a catalyst to activate persulfates to degrade tylosin in aqueous solutions. *New J. Chem.*, 2022, 46, 18917-18925.
- [2] Xu, Y.; Zhang Y.; Wang X.; Wang Z.; Huang, L., Wu, H.; Ren, J., Gu C.; Chen Z. Enhanced photodegradation of tylosin in the presence of natural montmorillonite: Synergistic effects of adsorption and surface hydroxyl radicals. *Sci. Total Environ.* 2023, 855, 158750.
- [3] Zhao, P.; Yang Y.; Pei Y.; Luo X. TEMPO-oxidized cellulose beads embedded with Au-doped TiO<sub>2</sub> nanoparticles for photocatalytic degradation of Tylosin. *Cellulose* 2023, 30, 1133-1147.
- [4] Zhang, G.; Huang, G.; Yang, C.; Chen S., Xu, Y., Zhang, S., Lu, P., Sun, J., Zhu, Y.; Yang, D. Efficient photoelectrocatalytic degradation of tylosin on TiO<sub>2</sub> nanotube arrays with tunable phosphorus dopants. *J. Environ. Chem. Eng.* 2021, 9, 104742.
- [5] Tizhoosh, I. Y.; Khataee, A.; Hassandoost, R.; Soltani, R. D. C.; Doustkhah, E. Ultrasound-engineered synthesis of WS<sub>2</sub>@CeO<sub>2</sub> heterostructure for sonocatalytic degradation of tylosin. *Ultrason. Sonochem.* 2020, 67, 105114.
- [6] Zhang, Q.; Li, Y.; Ma, W.; Bai, X.; Ru, X.; Zhang, L.; Zhong, S.; Shu, X. Three-dimensional recyclable FeS<sub>2</sub>/reduced graphene oxide aerogel with high porosity reticulated structure for efficient removal of tylosin tartrate. *Sep. Purif. Technol.* 2023, 324, 124463.
